# Supplementary material for: Two-dimensional stable transition metal carbides (MnC and NbC) with prediction and novel functionalizations
Source: Royal Society of Chemistry journal article supplement (doi:10.1039/c8cp04541k), 2018-01-01
Supplement: c8cp04541k1.pdf [file c8cp04541k1.pdf]

# Supporting Information

## Two-Dimensional Stable Transition Metal Carbides MnC and NbC with Prediction and novel Functionalizations

Bingwen Zhang <sup>\*1,4,5</sup>, Yina Huang<sup>2,5</sup>, Weicheng Bao<sup>3,1</sup>, Baolin Wang<sup>4</sup>, Qiangqiang Meng<sup>4</sup>, Lele Fan<sup>4</sup>, and Qinfang Zhang<sup>†4</sup>

<sup>1</sup>National Laboratory of Solid State Microstructures,  
Collaborative Innovation Center of Advanced Microstructures,  
and Department of Physics, Nanjing University, Nanjing,  
210093, China.

<sup>2</sup>Department of Physics, Zhejiang University of Science and  
Technology, Hangzhou, Zhejiang, 310023, China.

<sup>3</sup>Zhejiang University of Water Resources and Electric Power,  
Hangzhou 310018, China

<sup>4</sup>Laboratory for Advanced Technology in Environmental  
Protection of Jiangsu Province, Yancheng Institute of  
Technology, Yancheng, 224051, China.

<sup>5</sup>Contributed equally to this work as joint first author.

August 16, 2018

---

\*turney0524@163.com

†qfangzhang@gmail.com



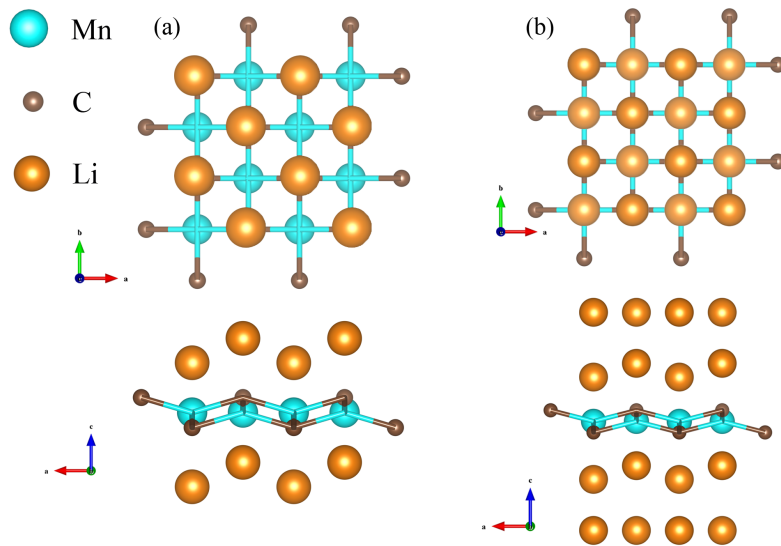

Figure S1: The optimized structures of (a) the adsorption structure of  $\text{Mn}_8\text{C}_8\text{Li}_{16}$  (b) the adsorption structure of  $\text{Mn}_8\text{C}_8\text{Li}_{32}$ .

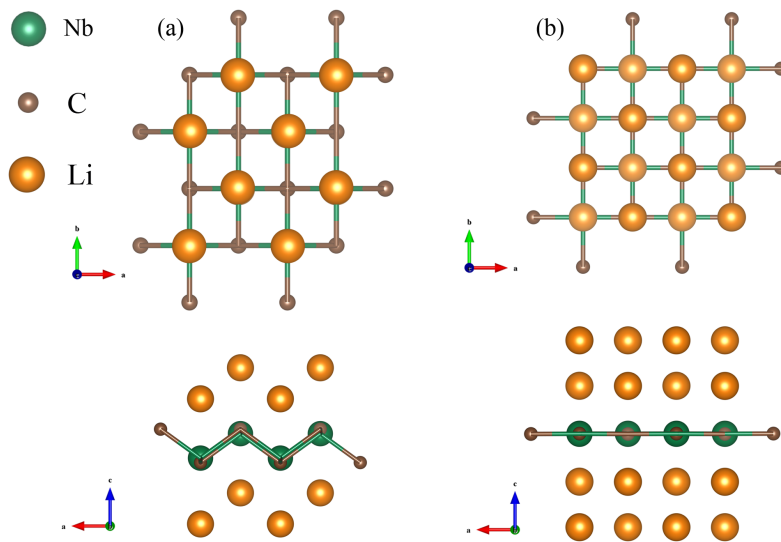

Figure S2: The optimized structures of (a) the adsorption structure of  $\text{Nb}_8\text{C}_8\text{Li}_{16}$  (b) the adsorption structure of  $\text{Nb}_8\text{C}_8\text{Li}_{32}$ .



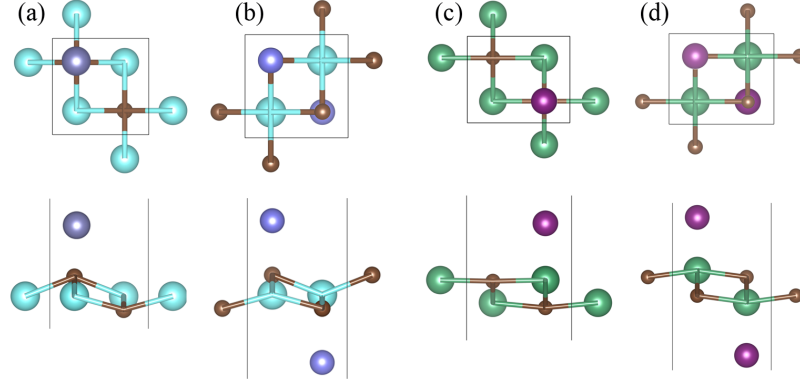

Figure S3: The optimized structures of (a) single surface and (b) double surface passivation by F, Cl, Br, I or O atom of MnC monolayer, and the optimized structures of (c) single surface and (d) double surface passivation by F, Cl, Br or I atom of NbC monolayer.

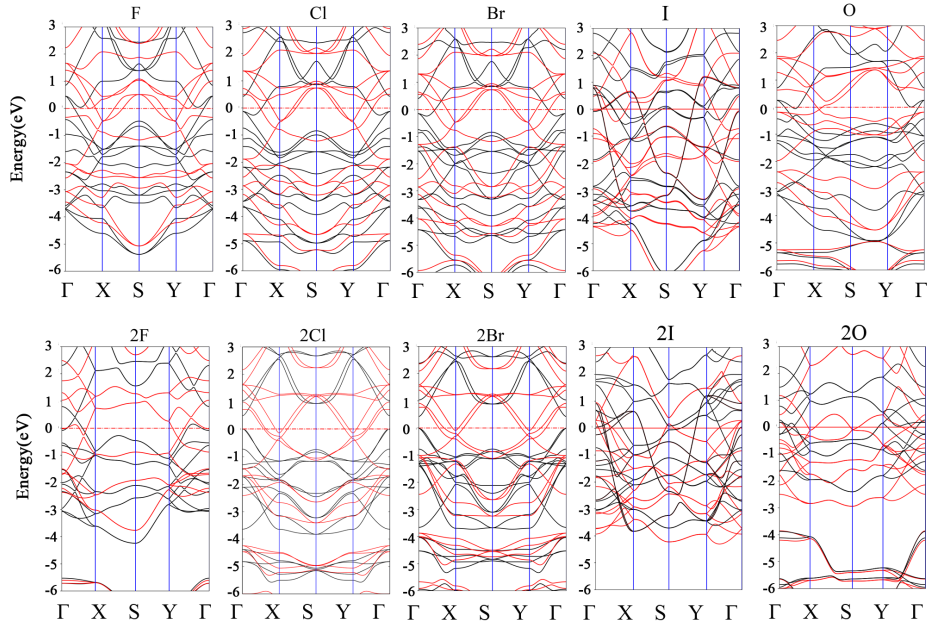

Figure S4: The electronic bands of single surface and double surface passivation by F, Cl, Br, I or O atom of MnC monolayer.



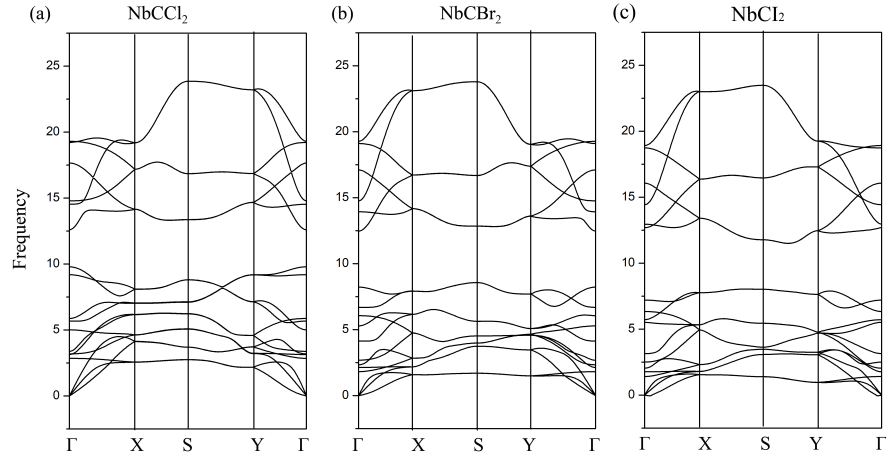

Figure S5: The phonon dispersion of double surface passivation by Cl, Br and I atom of NbC monolayer.



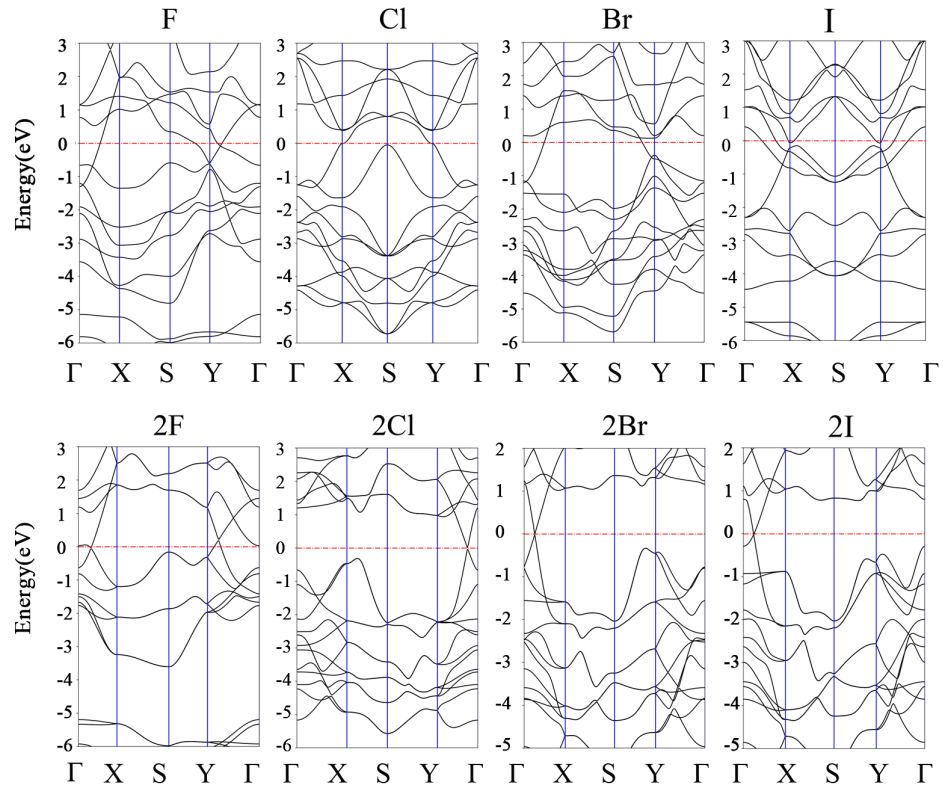

Figure S6: The electronic bands of single surface and double surface passivation by F, Cl, Br or I atom of NbC monolayer.



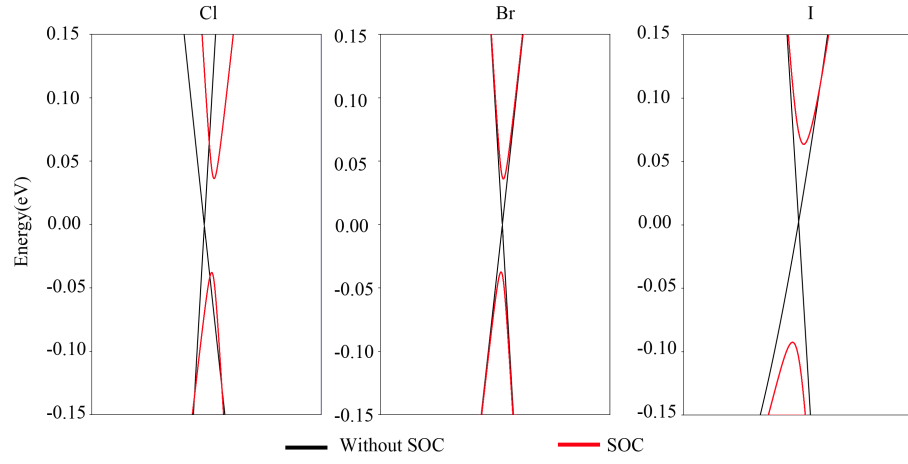

Figure S7: The zoom-in electronic bands of double surface passivation by Cl, Br or I atom of NbC monolayer with and without SOC.
